# Supplementary material for: Salvianolic Acid B Improves the Effect of Fat Grafts by Inhibiting the NF-kB Signalling Pathway in Macrophages
Source: Research Square preprint supplement (doi:10.21203/rs.3.rs-1039655/v1), 2021-11-10
Supplement: Supplementary file 1 [file 64146566d6aa625aca63c6d5.docx]

| Gene | | House Mouse(5’-3’) |
| --- | --- | --- |
| iNOS | Forward | GTTCTCAGCCCAACAATACAAGA |
| Reverse | GTGGACGGGTCGATGTCAC |
| TNF-α | Forward | GCGACGTGGAACTGGCAGAAG |
| Reverse | GTGGTTTGTGAGTGTGAGGGTCTG |
| Gapdh | Forward | CAGTGGCAAAGTGGAGATTGTTG |
| Reverse | TCGCTCCTGGAAGATGGTGAT |

Supplementary Table 1. Primers used for quantitative PCR
